# Supplementary material for: Story Telling Project in Pediatric Surgery, a non- pharmacological method to allay preoperative anxiety: Experience of a single center
Source: Research Square preprint supplement (doi:10.21203/rs.3.rs-8056620/v1), 2025-12-08
Supplement: Supplementary file 1 [file 1c35fba145564adae3a6a4bb.docx]

**LIST OF TABLES**

**Table 1**

*Results of m-YPAS (modified Yale perioperative anxiety scale) evaluation.*

| CASES (n. of patients) | m-YPAS T0 >30 12/23 52,17% | m-YPAS T1>30 4/23 17,39% |
| --- | --- | --- |
|  | m-YPAS T0 <30 11/23 47,83% | m-YPAS T1<30 19/23 82,61% |
| CONTROLS (n. of patients) | m-YPAS T0 >30 19/25 76% | m-YPAS T1>30 16/25 64% |
|  | m-YPAS T0 <30 6/25 24% | m-YPAS T1<30 9/25 36% |

**Table 2**

*Results of WATCHA-behavioural scale, postoperative evaluation after 60 minutes.*

| SCORE (ED>2) | n. patients /total (48) | % participants at the “story telling” activity | p value |
| --- | --- | --- | --- |
| 0 | 15 | 5/15 33,3% | 0,90 v=1 |
| 1 | 29 | 16/29 55,2% | 0,95 v=1 |
| 2 | 3 | 2/3 66,6% | 0,50 v=1 |
| 3 | 0 |  |  |
| 4 | 1 |  |  |

**Table 3**

m Y-PAS average values at T0 and T1 into both groups.

|  | m-YPAS t0  average value | m-YPAS t1  average value |
| --- | --- | --- |
| Group A | 36,5 [60-23] | 28,7 [60-22] |
| Group B | 39,9 [16-75] | 37,6 [75-23] |

**Table 4**

m-YPAS values >30, total, group A and group B

|  | m-YPAS t0  average value, %>30 | m-YPAS t1  average value, %>30 | p value |
| --- | --- | --- | --- |
| tot | 31(31/48 ) 64,5 % | 20 (20/48) 41,6% | **p= 0,05 v=1** |
| Group A | 12 (12/23) 52,17 % | 4 (4/23) 17,3% | **p=0,025 v=1** |
| Group B | 19 (19/25) 76% | 16( 16/25) 64% | p= 0,5 v=1 |

**Table 5**

m-YPAS values < 30, total, group A and group B

|  | m-YPAS t0  average value, %<30 | m-YPAS t1  average value, %<30 | p value |
| --- | --- | --- | --- |
| tot | 27(27/48 ) 56,25 % | 28 (28/48) 58,3% | p= 0,10 v=1 |
| Group A | 11 (11/23) 47,8 % | 19 (19/23) 82,6% | p=0,975 v=1 |
| Group B | 6 (6/25) 24% | 9 (9/25) 36% | p= 0,75 v=1 |
