# Supplementary material for: Story Telling Project in Pediatric Surgery, a non- pharmacological method to allay preoperative anxiety: Experience of a single center
Source: Research Square preprint supplement (doi:10.21203/rs.3.rs-8056620/v1), 2025-12-08
Supplement: Supplementary file 2 [file 217a3d18462dbdef03e60669.docx]

LIST OF APPENDIX

**Appendix 1**

**MODIFIED YALE PREOPERATIVE ANXIETY SCALE (m-YPAS)**

*Surname ........................................ Name ..................................................... Age................................................... Surgery’s date.................................*

*Pathology .......................................................................................................... Observer...........................................................................................*

| **ITEM** | **SCORES** |
| --- | --- |
| ACTIVITY | 1 2 3 4 |
| VOCALIZATIONS | 1 2 3 4 5 6 |
| EMOTIONAL EXPRESSIVITY | 1 2 3 4 |
| STATE OF AROUSAL | 1 2 3 4 |
| USE OF PARENT | 1 2 3 4 |

*Test*

| **ITEM (**d**)** | **SCORES** |
| --- | --- |
| ACTIVITY | *…/4* |
| VOCALIZATIONS | *…/6* |
| EMOTIONAL EXPRESSIVITY | *…/4* |
| STATE OF AROUSAL | *…/4* |
| USE OF PARENT | *…/4* |
| TOTAL (l) | *…/…* |

*Result =………….*

*Cut off=30+/-5*

*Activity
1 = Looking around, curious, playing with toys, reading (or other age-appropriate behavior); moves around holding area/treatment room to get toys or go to parent; may move toward OR equipment.
2 = Not exploring or playing, may look down, may fidget with hands or suck thumb (blanket); may sit close to parent while waiting, or play has a definite manic quality.
3 = Moving from toy to parent in unfocused manner, nonactivity-derived movements; frenetic/frenzied movement or play; squirming, moving on table, may push mask away, or clinging to parent.
4 = Actively trying to get away, pushes with feet and arms, may move whole body; in waiting room, running around unfocused, not looking at toys or will not separate from parent, desperate clinging.*

*Vocalizations
1 = Reading (nonvocalizing appropriate to activity), asking questions, making comments, babbling, laughing, readily answers questions but may be generally quiet; child too young to talk in social situations or too engrossed in play to respond.
2 = Responding to adults but whispers, “baby talk,” only head nodding.
3 = Quiet, no sounds or responses to adults.
4 = Whimpering, moaning, groaning, silently crying.
5 = Crying or may be screaming “no.*

*6 = Crying, screaming loudly, sustained audible*

*Emotional expressivity
1 = Manifestly happy, smiling, or concentrating on play. 2 = Neutral, no visible expression on face.
3 = Worried (sad) to frightened, sad, worried, or tearful eyes.
4 = Distressed, crying, extremely upset, may have wide eyes.*

*State of apparent arousal
1 = Alert, looks around occasionally, notices or watches what anesthesiologist does with him/her (could be relaxed).
2 =Withdrawn, child sitting still and quiet, may be sucking on thumb or face turned into adult.
3 =Vigilant, looking quickly all around, may startle to sounds, eyes wide, body tensed.
4 =Panicked whimpering, may be crying or pushing others away, turns away.*

*Use of parents
1 = Busy playing, sitting idle, or engaged in age- appropriate behavior and does not need parent; may interact with parent if parent initiates the interaction.
2 = Reaches out to parent (approaches parent and speaks to otherwise silent parent), seeks and accepts comfort, may lean against parent.
3 = Looks to parents quietly, apparently watches actions, does not seek contact or comfort, accepts it if offered or clings to parent.
4 = Keeps parent at distance or may actively withdraw from parent, may push parent away or desperately clinging to parent and will not let parent go.*

*Appendix 1: description of* **modified yale preoperative anxiety scale (m-ypas)**

**Appendix 2**

***WATCHA BEHAVIOURAL SCALE***

*Surname ........................................ Name ..................................................... Age................................................... Surgery’s date.................................*

*Pathology .......................................................................................................... Observer......................................................................................................*

| **ITEM** | **SCORES** |
| --- | --- |
| Sleeping | 0 |
| Calm | 1 |
| Consolable cry | 2 |
| Inconsolable cry | 3 |
| Very agitated | 4 |

*Watcha behavioral scale score > 2 is positive for Emergence Delirium and psyco-motor agitation.*

***Appendix 2: description of watcha behavioural scale***
